# Supplementary material for: Large influence of atmospheric vapor pressure deficit on ecosystem production efficiency
Source: PubMed Central journal article supplement (PMC8964671; doi:10.1038/s41467-022-29009-w), 2022-03-29
Supplement: 41467_2022_29009_MOESM1_ESM.pdf [file 41467_2022_29009_MOESM1_ESM.pdf]

**Supplementary Information for “Large influence of atmospheric vapor pressure deficit on ecosystem production efficiency” by Lu et al.**

## Supplementary Information

### Large influence of atmospheric vapor pressure deficit on ecosystem production efficiency

Haibo Lu<sup>1</sup>, Zhangcai Qin<sup>1</sup>, Shangrong Lin<sup>1</sup>, Xiuzhi Chen<sup>1</sup>, Baozhang Chen<sup>2,3</sup>, Bin He<sup>4</sup>, Jing Wei<sup>1</sup>, Wenping Yuan<sup>1\*</sup>

<sup>1</sup> School of Atmospheric Sciences, Southern Marine Science and Engineering Guangdong Laboratory (Zhuhai), Sun Yat-sen University, Zhuhai, Guangdong 519082, China

<sup>2</sup> School of Remote Sensing and Geomatics Engineering, Nanjing University of Information Science and Technology, Nanjing, Jiangsu 210044, China

<sup>3</sup> State Key Laboratory of Resource and Environmental Information System, Institute of Geographic Sciences and Natural Resources Research, Chinese Academy of Sciences, Beijing 100101, China

<sup>4</sup> State Key Laboratory of Earth Surface Processes and Resource Ecology, College of Global Change and Earth System Science, Beijing Normal University, Beijing 100875, China

Corresponding author: Wenping Yuan, [yuanwp3@mail.sysu.edu.cn](mailto:yuanwp3@mail.sysu.edu.cn)

**Matters Arising from** Liu, L. et al. Soil moisture dominates dryness stress on ecosystem production globally. *Nat. Commun.* **11**, 4892 (2020).

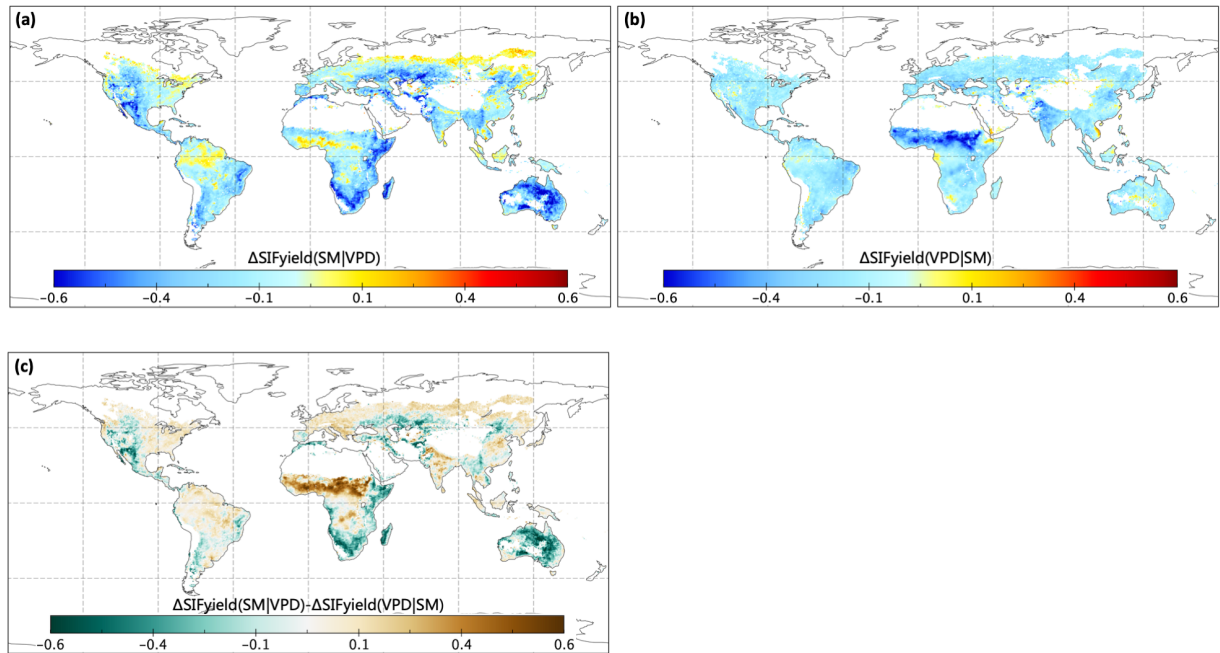

**Supplementary Figure 1.** The comparison on impacts of soil moisture (SM) and vapor pressure deficit (VPD) on fluorescence quantum yield ( $SIF_{yield}$ ). (a)  $\Delta SIF_{yield}(SM|VPD)$  indicates the changes of  $SIF_{yield}$  caused by soil moisture decrease. (b)  $\Delta SIF_{yield}(VPD|SM)$  indicates the changes of  $SIF_{yield}$  caused by VPD increase. (c) Differences between  $\Delta SIF_{yield}(SM|VPD)$  and  $\Delta SIF_{yield}(VPD|SM)$ . The positive values indicate larger impacts of VPD relative to SM in (c). Note, where  $\Delta SIF_{yield}(SM|VPD) > 0$ , the difference equals to  $\Delta SIF_{yield}(VPD|SM)$  in (c); where  $\Delta SIF_{yield}(VPD|SM) > 0$ , the difference is  $\Delta SIF_{yield}(SM|VPD)$ ; and where both are positive, the difference is not shown. For better comparability in space, the  $SIF_{yield}$  data time series was normalized by the average  $SIF_{yield}$  exceeding 90<sup>th</sup> percentile per pixel. The units refer to the fractions relative to average  $SIF_{yield}$  exceeding the 90<sup>th</sup> percentile in each grid cell.

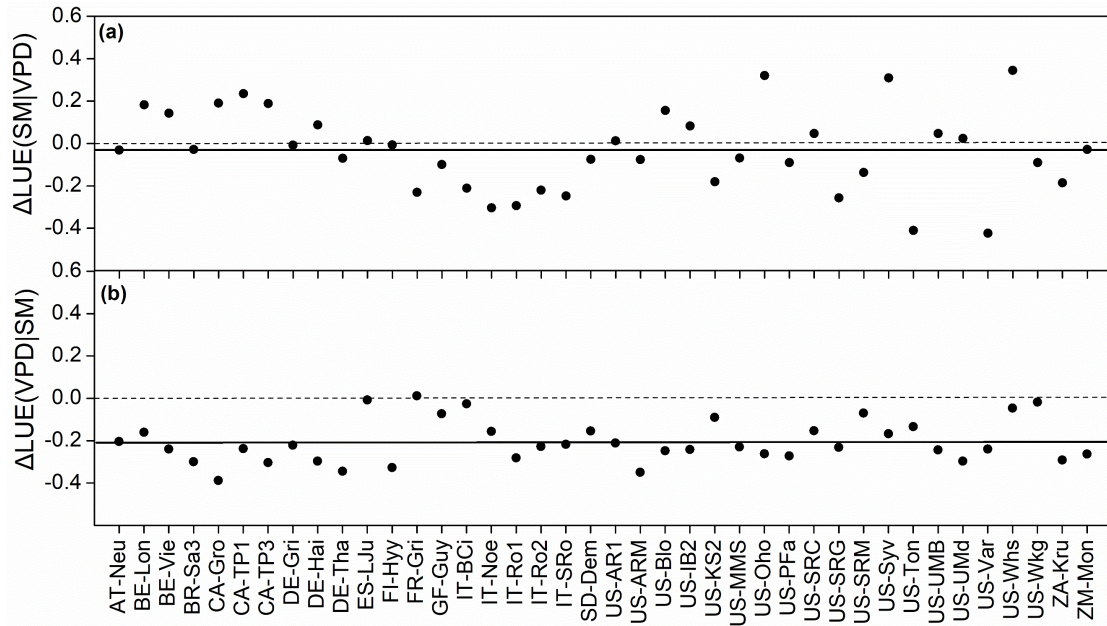

**Supplementary Figure 2.** The comparison on impacts of soil moisture (SM) and vapor pressure deficit (VPD) on light use efficiency (LUE) at 40 eddy covariance towers. (a)  $\Delta LUE(SM|VPD)$  indicates the changes of LUE caused by soil moisture decrease. (b)  $\Delta LUE(VPD|SM)$  indicates the changes of LUE caused by VPD increase. The dark solid lines in (a) and (b) indicate the mean  $\Delta LUE(SM|VPD)$  and  $\Delta LUE(VPD|SM)$  across all sites, respectively. For better comparability in space, the LUE data time series was normalized by the average LUE exceeding 90<sup>th</sup> percentile for each site. The units refer to the fractions relative to average LUE exceeding the 90<sup>th</sup> percentile at each site.

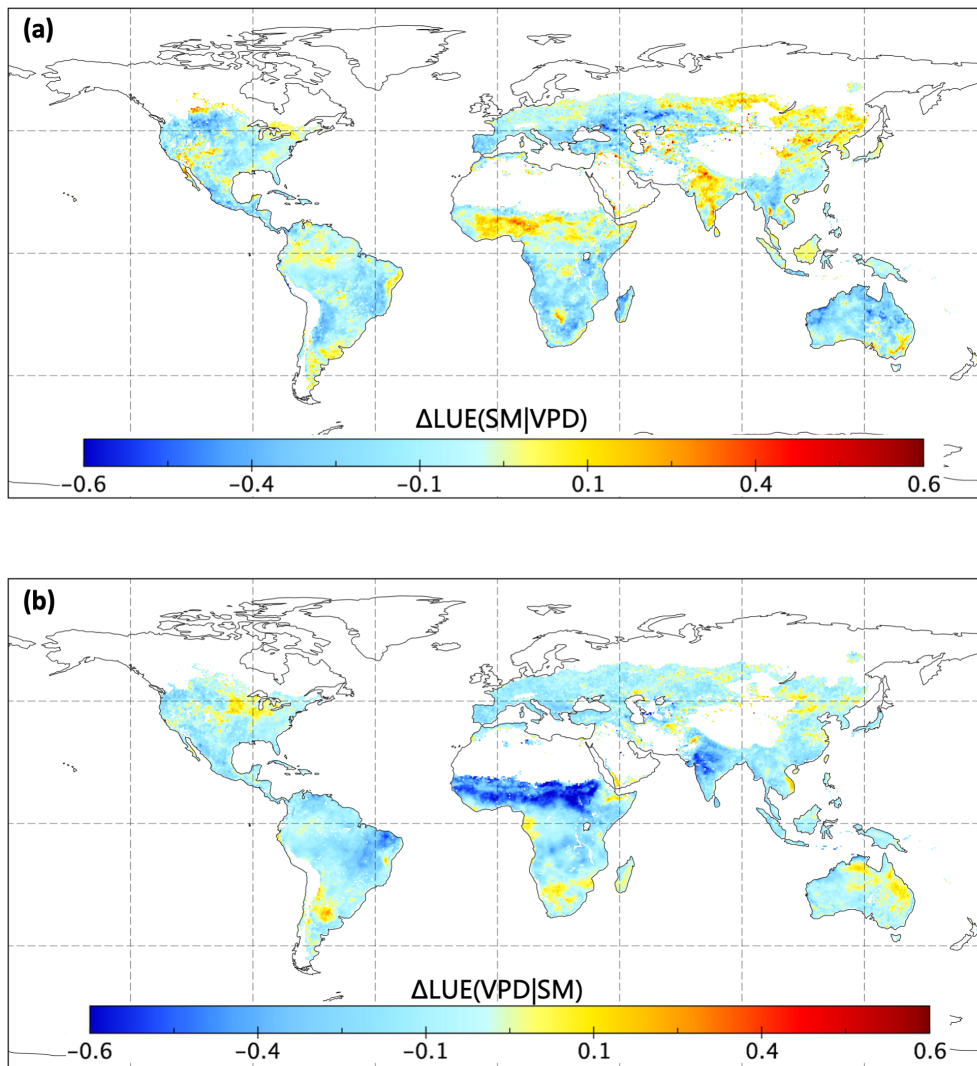

**Supplementary Figure 3.** The comparison on impacts of soil moisture (SM) and vapor pressure deficit (VPD) on light use efficiency (LUE) derived from FLUXCOM dataset globally. (a)  $\Delta LUE(SM|VPD)$  indicates the changes of LUE caused by soil moisture decrease. (b)  $\Delta LUE(VPD|SM)$  indicates the changes of LUE caused by VPD increase. For better comparability in space, the  $SIF_{yield}$  data time series were normalized by the average  $SIF_{yield}$  exceeding 90<sup>th</sup> percentile per pixel. The units refer to the fractions relative to average  $SIF_{yield}$  exceeding the 90<sup>th</sup> percentile in each grid cell.

**Supplementary Table 1.** List of eddy covariance sites used in this study.

| Site   | Latitude | Longitude | Type* | Study Period |
|--------|----------|-----------|-------|--------------|
| AT-Neu | 47.11°N  | 11.31°E   | GRA   | 2002-2012    |
| BE-Lon | 50.55°N  | 4.75°E    | CRO   | 2004-2014    |
| BE-Vie | 50.31°N  | 5.99°E    | MF    | 1996-2014    |
| BR-Sa3 | 3.02°S   | 54.97°W   | EBF   | 2000-2004    |
| CA-Gro | 48.22°N  | 82.15°W   | MF    | 2003-2014    |
| CA-TP1 | 42.66°N  | 80.56°W   | ENF   | 2002-2014    |
| CA-TP3 | 42.71°N  | 80.35°W   | ENF   | 2002-2014    |
| DE-Gri | 50.95°N  | 13.51°E   | GRA   | 2004-2014    |
| DE-Hai | 51.08°N  | 10.45°E   | DBF   | 2000-2012    |
| DE-Tha | 50.97°N  | 13.57°E   | ENF   | 1996-2014    |
| ES-LJu | 36.93°N  | 2.75°W    | SHR   | 2004-2013    |
| FI-Hyy | 61.85°N  | 24.30°E   | ENF   | 1996-2014    |
| FR-Gri | 48.84°N  | 1.95°E    | CRO   | 2004-2014    |
| GF-Guy | 5.29°N   | 52.92°W   | EBF   | 2004-2014    |
| IT-BCi | 40.52°N  | 14.96°E   | CRO   | 2004-2014    |
| IT-Noe | 40.61°N  | 8.15°E    | SHR   | 2004-2014    |
| IT-Ro1 | 42.41°N  | 11.93°E   | DBF   | 2000-2008    |
| IT-Ro2 | 42.39°N  | 11.92°E   | DBF   | 2002-2012    |
| IT-SRo | 43.73°N  | 10.28°E   | ENF   | 1999-2012    |
| SD-Dem | 13.28°N  | 30.48°E   | SAV   | 2005-2009    |
| US-AR1 | 36.43°N  | 99.42°W   | GRA   | 2009-2012    |
| US-ARM | 36.61°N  | 97.49°W   | CRO   | 2003-2012    |
| US-Blo | 38.90°N  | 120.63°W  | ENF   | 1997-2007    |
| US-IB2 | 41.84°N  | 88.24°W   | GRA   | 2004-2013    |
| US-KS2 | 28.61°N  | 80.67°W   | SHR   | 2003-2006    |
| US-MMS | 39.32°N  | 86.41°W   | DBF   | 1999-2014    |
| US-Oho | 41.55°N  | 83.84°W   | DBF   | 2004-2013    |
| US-PFa | 45.95°N  | 90.27°W   | MF    | 1995-2014    |
| US-SRC | 31.91°N  | 110.84°W  | SHR   | 2008-2014    |
| US-SRG | 31.79°N  | 110.83°W  | GRA   | 2008-2014    |
| US-SRM | 31.82°N  | 110.87°W  | SAV   | 2004-2014    |
| US-Syv | 46.24°N  | 89.35°W   | MF    | 2001-2014    |
| US-Ton | 38.43°N  | 120.97°W  | SAV   | 2001-2014    |
| US-UMB | 45.56°N  | 84.71°W   | DBF   | 2000-2014    |
| US-UMd | 45.56°N  | 84.70°W   | DBF   | 2007-2014    |
| US-Var | 38.41°N  | 120.95°W  | GRA   | 2000-2014    |
| US-Whs | 31.74°N  | 110.05°W  | SHR   | 2007-2014    |
| US-Wkg | 31.74°N  | 109.94°W  | GRA   | 2004-2014    |
| ZA-Kru | 25.02°S  | 31.50°E   | SAV   | 2000-2013    |
| ZM-Mon | 15.44°S  | 23.25°E   | DBF   | 2000-2009    |

\*CRO: cropland; DBF: deciduous broadleaf forest; EBF: evergreen broadleaf forest; ENF: evergreen needleleaf forest; GRA: grassland; MF: mixed forest; SAV: savanna; SHR: shrubland.

**Supplementary Table 2.** List of datasets used in this study.

| <b>Variables</b>                                                          | <b>Dataset name</b> | <b>Coverage, resolution</b> | <b>Time span</b> | <b>References and sources</b>                                                                                                                                                                                     |
|---------------------------------------------------------------------------|---------------------|-----------------------------|------------------|-------------------------------------------------------------------------------------------------------------------------------------------------------------------------------------------------------------------|
| Solar-induced chlorophyll fluorescence                                    | OCO2-CSIF           | Global, 0.5°×0.5°; 4-day    | 2001 - 2016      | Zhang, et al. <sup>1</sup><br><a href="https://figshare.com/articles/CSIF/6387494">https://figshare.com/articles/CSIF/6387494</a>                                                                                 |
| Gross primary production (GPP)                                            | FLUXCOM             | Global, 0.5°×0.5°; daily    | 1982 - 2013      | Tramontana, et al. <sup>2</sup><br><a href="http://www.fluxcom.org/CF-Download/">http://www.fluxcom.org/CF-Download/</a>                                                                                          |
| Estimated GPP based on eddy covariance measurements                       | FLUXNET2015         | Site, daily                 | 1995 - 2014      | Pastorello, et al. <sup>3</sup><br><a href="https://fluxnet.org/data/fluxnet2015-dataset/">https://fluxnet.org/data/fluxnet2015-dataset/</a>                                                                      |
| Soil moisture; Air temperature; Dewpoint temperature; Air pressure        | ERA-Interim         | Global, 0.5°×0.5°; 6-hour   | 2001 - 2016      | <a href="https://www.ecmwf.int/en/forecasts/datasets/reanalysis-datasets/era-interim">https://www.ecmwf.int/en/forecasts/datasets/reanalysis-datasets/era-interim</a>                                             |
| Photosynthetically active radiation (PAR)                                 | MERRA2              | Global, 0.5°×0.625°; 1-hour | 1982 - 2016      | <a href="https://disc.sci.gsfc.nasa.gov/datasets/M2T1_NXLFO_5.12.4/summary?keywords=MERRA2_tavg1_2d_lfo_NX">https://disc.sci.gsfc.nasa.gov/datasets/M2T1_NXLFO_5.12.4/summary?keywords=MERRA2_tavg1_2d_lfo_NX</a> |
| Fraction of photosynthetically active radiation absorbed by plants (fPAR) | GLASS               | Global, 0.5°×0.5°; 8-day    | 1982 - 2018      | Xiao, et al. <sup>4</sup><br><a href="http://www.glass.umd.edu/">http://www.glass.umd.edu/</a>                                                                                                                    |



## Supplementary References

- 1 Zhang, Y., Joiner, J., Alemohammad, S. H., Zhou, S. & Gentine, P. A global spatially contiguous solar-induced fluorescence (CSIF) dataset using neural networks. *Biogeosciences* **15**, 5779-5800 (2018).
- 2 Tramontana, G. et al. Predicting carbon dioxide and energy fluxes across global FLUXNET sites with regression algorithms. *Biogeosciences* **13**, 4291-4313 (2016).
- 3 Pastorello, G. et al. The FLUXNET2015 dataset and the ONEFlux processing pipeline for eddy covariance data. *Sci. Data* **7**, 1-27 (2020).
- 4 Xiao, Z., Liang, S., Sun, R., Wang, J. & Jiang, B. Estimating the fraction of absorbed photosynthetically active radiation from the MODIS data based GLASS leaf area index product. *Remote Sens. Environ.* **171**, 105-117 (2015).
